# Supplementary material for: Epitope–Paratope Interaction of a Neutralizing Human Anti-Hepatitis B Virus PreS1 Antibody That Recognizes the Receptor-Binding Motif
Source: MDPI journal article supplement (doi:10.3390/vaccines9070754), 2021-07-07
Supplement: s1 [file s1]

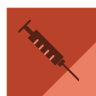

## Supplementary Figures

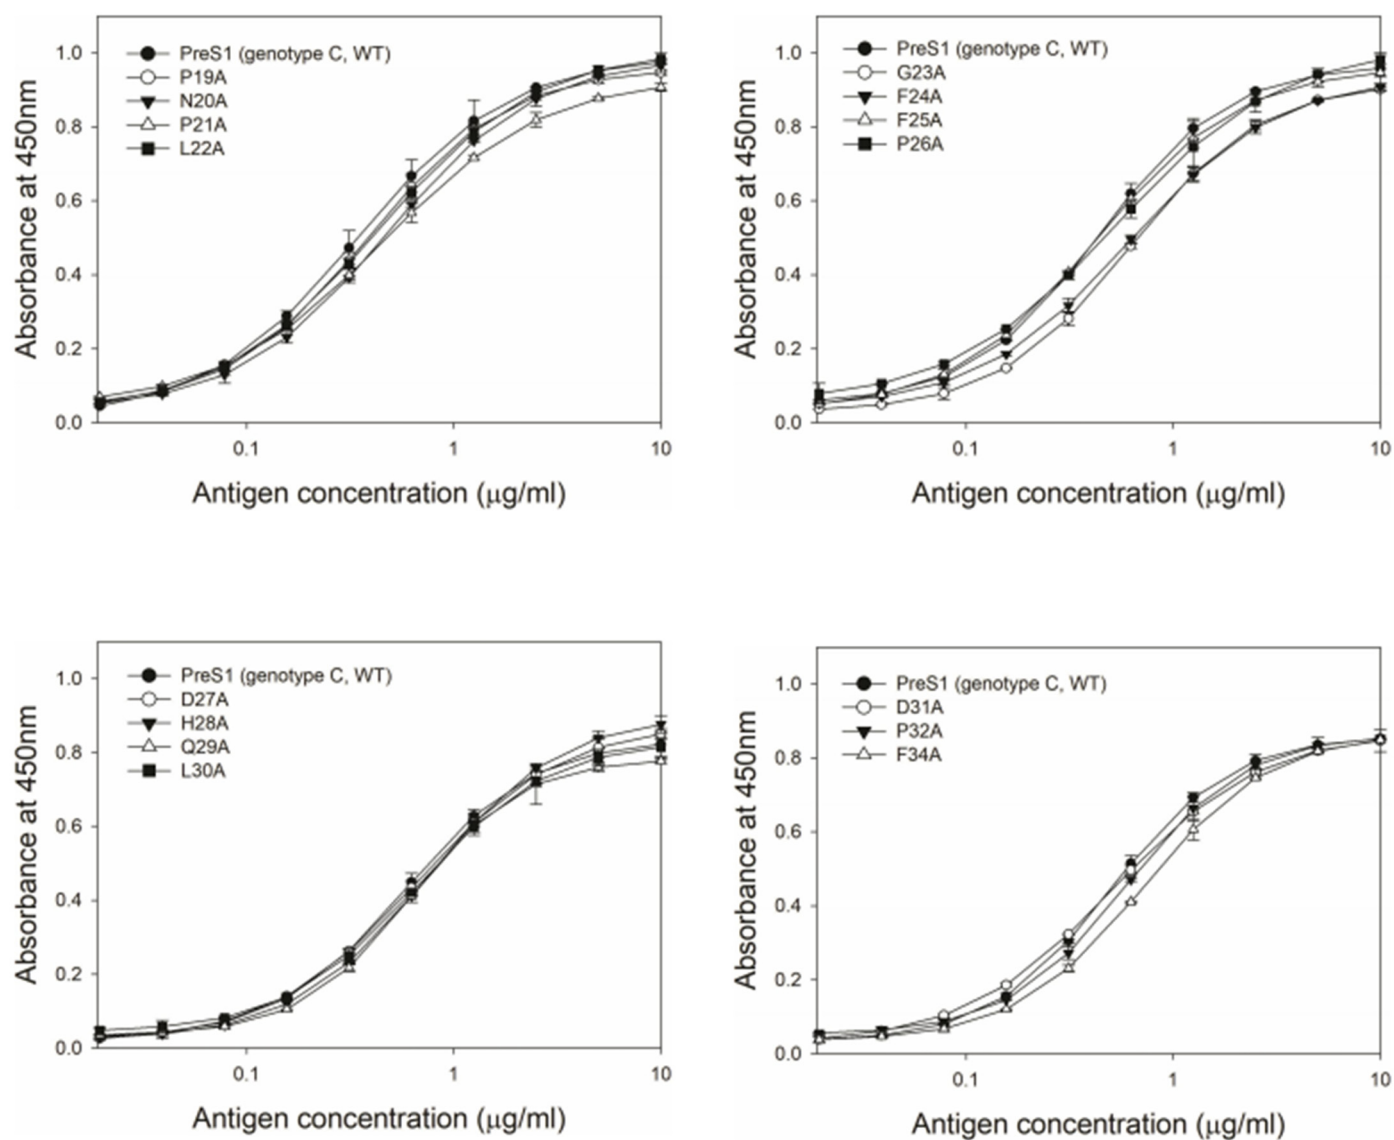

**Figure S1.** Quantitative ELISA of the antibody-binding activities of purified GST-preS1(aa 1–56)-strep carrying alanine substitution.

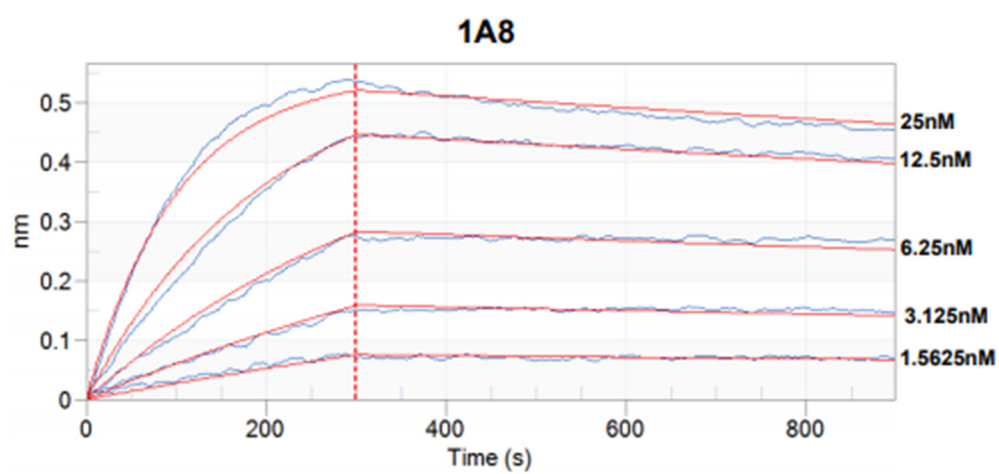

**Figure S2.** Affinity determination of 1A8 by Bio-Layer interferometry using Octet 384.
